# Supplementary material for: Genome-wide identification, and phylogenetic and expression profiling analyses, of XTH gene families in Brassica rapa L. and Brassica oleracea L.
Source: Research Square preprint supplement (doi:10.21203/rs.3.rs-62331/v2), 2020-10-12
Supplement: Supplementary file 1 [file 44c0fa7cad8c226c511b3cad.xlsx]

## Sheet: B. oleracea
Table S1 Estimated Ka/Ks ratios of duplicated XTH gene pairs in B. rapa and B. oleracea
Duplicated gene pairs		Ka	Ks	Ka/Ks	Duplication Time(Mya)	Duplication type	Types of selection
BolC.XTH11.b	BolC.XTH11.a	0.123203	0.161246	0.764067	5.37487	Segmental	Purify selection
BolC.XTH12	BolC.XTH13	0.0366224	0.338171	0.108296	11.2724	Segmental	Purify selection
BolC.XTH16	BolC.XTH15	0.0809132	0.963657	0.0839647	32.1219	Segmental	Purify selection
BolC.XTH24.b	BolC.XTH24.a	0.0394153	0.376204	0.104771	12.5401	Segmental	Purify selection
BolC.XTH24.c	BolC.XTH24.b	0.110815	0.376204	0.294562	12.5401	Segmental	Purify selection
BolC.XTH24.a	BolC.XTH24.c	0.0824851	0.303929	0.271396	10.131	Segmental	Purify selection
BolC.XTH24.b	BolC.XTH24.c	0.110815	0.376204	0.294562	12.5401	Segmental	Purify selection
BolC.XTH24.d	BolC.XTH24.c	0.0957259	0.351261	0.272521	11.7087	Segmental	Purify selection
BolC.XTH24.a	BolC.XTH24.d	0.0392269	0.32259	0.1216	10.753	Segmental	Purify selection
BolC.XTH24.b	BolC.XTH24.d	0.0376092	0.414659	0.0906991	13.822	Segmental	Purify selection
BolC.XTH24.c	BolC.XTH24.d	0.0957259	0.351261	0.272521	11.7087	Segmental	Purify selection
BolC.XTH27.a	BolC.XTH27.b	0.0709324	0.394818	0.179659	13.1606	Segmental	Purify selection
BolC.XTH29.b	BolC.XTH29.a	0.0657161	0.512226	0.128295	17.0742	Segmental	Purify selection
BolC.XTH30.b	BolC.XTH30.a	0.0313362	0.578843	0.0541359	19.2948	Segmental	Purify selection
BolC.XTH32.a	BolC.XTH32.b	0.0680272	0.344493	0.19747	11.4831	Segmental	Purify selection
BolC.XTH32.a	BolC.XTH32.c	0.052696	0.296661	0.17763	9.88871	Segmental	Purify selection
BolC.XTH9.a	BolC.XTH9.b	0.0192389	0.269385	0.071418	8.9795	Segmental	Purify selection
	Means	0.0682649	0.395989	0.205151	13.1996

## Sheet: B. rapa
Duplicated gene pairs		Ka	Ks	Ka/Ks	Duplication Time(Mya)	Duplication type	Types of selection
BraA.XTH12.a	BraA.XTH12.b	0.0319773	0.329342	0.0970945	10.9781	Segmental	Purify selection
BraA.XTH12.a	BraA.XTH12.c	0.0220325	0.30377	0.0725301	10.1257	Segmental	Purify selection
BraA.XTH12.c	BraA.XTH12.b	0.034809	0.293179	0.11873	9.77262	Segmental	Purify selection
BraA.XTH14.b	BraA.XTH14.a	0.0700377	0.34437	0.203379	11.479	Segmental	Purify selection
BraA.XTH16	BraA.XTH15	0.0758741	0.863986	0.0878186	28.7995	Segmental	Purify selection
BraA.XTH17.a	BraA.XTH17.d	0.0510401	0.385793	0.132299	12.8598	Segmental	Purify selection
BraA.XTH17.a	BraA.XTH17.e	0.0711345	0.497784	0.142902	16.5928	Segmental	Purify selection
BraA.XTH17.a	BraA.XTH18	0.0764739	0.515994	0.148207	17.1998	Segmental	Purify selection
BraA.XTH17.b	BraA.XTH17.a	0.0384067	0.333034	0.115324	11.1011	Segmental	Purify selection
BraA.XTH17.c	BraA.XTH17.a	0.0604541	0.394647	0.153185	13.1549	Segmental	Purify selection
BraA.XTH17.c	BraA.XTH17.d	0.0663283	0.41628	0.159336	13.876	Segmental	Purify selection
BraA.XTH17.c	BraA.XTH17.e	0.078181	0.462846	0.168914	15.4282	Segmental	Purify selection
BraA.XTH17.d	BraA.XTH18	0.0768159	0.613269	0.125256	20.4423	Segmental	Purify selection
BraA.XTH17.e	BraA.XTH17.a	0.0711345	0.497784	0.142902	16.5928	Segmental	Purify selection
BraA.XTH17.e	BraA.XTH17.b	0.0478594	0.448317	0.106753	14.9439	Segmental	Purify selection
BraA.XTH17.e	BraA.XTH17.d	0.0709127	0.540041	0.13131	18.0014	Segmental	Purify selection
BraA.XTH17.e	BraA.XTH18	0.0273873	0.362329	0.0755869	12.0776	Segmental	Purify selection
BraA.XTH2.b	BraA.XTH2.a	0.0718871	0.122082	0.588843	4.0694	Segmental	Purify selection
BraA.XTH22.a	BraA.XTH22.b	0.0321538	0.347134	0.0926264	11.5711	Segmental	Purify selection
BraA.XTH22.a	BraA.XTH22.d	0	0	\	\	tendam	\
BraA.XTH22.c	BraA.XTH22.b	0.0321027	0.366955	0.0874841	12.2318	Segmental	Purify selection
BraA.XTH22.c	BraA.XTH22.d	0.00201073	0	\	\	tendam	\
BraA.XTH23.a	BraA.XTH23.b	0.00451582	0.010345	0.436522	0.344833	Segmental	Purify selection
BraA.XTH24.a	BraA.XTH24.b	0.0468778	0.349713	0.134047	11.6571	Segmental	Purify selection
BraA.XTH24.c	BraA.XTH24.a	0.0418746	0.452288	0.0925839	15.0763	Segmental	Purify selection
BraA.XTH24.c	BraA.XTH24.b	0.041947	0.446345	0.0939789	14.8782	Segmental	Purify selection
BraA.XTH25.a	BraA.XTH25.b	0.0529725	0.273792	0.193477	9.12639	Segmental	Purify selection
BraA.XTH27.b	BraA.XTH27.a	0.0525267	0.378595	0.138741	12.6198	Segmental	Purify selection
BraA.XTH29.a	BraA.XTH29.b	0.0502799	0.357576	0.140613	11.9192	Segmental	Purify selection
BraA.XTH31.a	BraA.XTH31.b	0.0565575	0.466015	0.121364	15.5338	Segmental	Purify selection
BraA.XTH32.a	BraA.XTH32.b	0.0306089	0.270607	0.113112	9.02024	Segmental	Purify selection
BraA.XTH32.a	BraA.XTH32.c	0.0268118	0.322615	0.083108	10.7538	Segmental	Purify selection
BraA.XTH32.b	BraA.XTH32.c	0.0359844	0.293798	0.12248	9.79326	Segmental	Purify selection
BraA.XTH5.a	BraA.XTH5.b	0.0233059	0.4109	0.056719	13.6967	Segmental	Purify selection
BraA.XTH9.a	BraA.XTH9.b	0.017044	0.277174	0.061492	9.23914	Segmental	Purify selection
	Means	0.0454377	0.364249	0.143598	12.8775
